# Supplementary material for: N4-cytosine DNA methylation regulates transcription and pathogenesis in Helicobacter pylori
Source: PubMed Central journal article supplement — Nucleic Acids Res. 2018 Feb 22;46(7):3429–45. doi: 10.1093/nar/gky126 (PMC5909468; doi:10.1093/nar/gky126), 2018-02-22
Supplement: gky126_supp.pdf [file gky126_supp.pdf]

Figure S1

|         |                                                              |                               |     |
|---------|--------------------------------------------------------------|-------------------------------|-----|
| CC33C   | -----TCAG-----                                               | CCGTTTTTAGAATGC               | 19  |
| OKI128  | -----TCAG-----                                               | CCGTTTTTAGAATGC               | 19  |
| 52      | -----TCAG-----                                               | CCGTTTTTAGAATGC               | 19  |
| OK113   | -----AP-TCAG-----                                            | CCGTTTTTAGAATGC               | 21  |
| OK310   | -----TCAG-----                                               | CCGTTTTTAGAATGC               | 19  |
| UM066   | -----TCAG-----                                               | CCGTTTTTAGAATGC               | 19  |
| MIT     | -----TTAGAAAAAATTTTACAAGAAATTACCCAGCTTGACCCTAGCAAAAAGTGT     |                               | 51  |
| SHEEBA  | -----                                                        |                               | 0   |
| J99     | -----                                                        |                               | 0   |
| Pecan18 | -----                                                        |                               | 0   |
| 26695   | ATGCCAAAATTAGAAAAAATTTTGCTAGAAATCACACAGCTTGACCCTAGTAAAGAGTGT |                               | 60  |
| Shi417  | ATGCCAAAATTAGAAAAAATTTTGCTAGAAATCACACAGCTTGACCCCAGCAAGGAGTGT |                               | 60  |
| SHI470  | -----                                                        |                               | 0   |
| SAT464  | -----                                                        |                               | 0   |
| SHI169  | -----                                                        |                               | 0   |
| ML2     | -----                                                        |                               | 0   |
| OKI154  | -----                                                        |                               | 0   |
| OKI673  | -----                                                        |                               | 0   |
| OKI828  | -----                                                        |                               | 0   |
|         |                                                              |                               |     |
| CC33C   | AATAAATCTTTAT-----                                           | TGTATTCCAA                    | 42  |
| OKI128  | AATAAATCTTTAT-----                                           | TGTATTCCAA                    | 42  |
| 52      | AATAAATCTTTAT-----                                           | TGTATTCCAA                    | 42  |
| OK113   | AATAAATCTTTAT-----                                           | TGTATTCCAA                    | 44  |
| OK310   | AATAAATCTTTAT-----                                           | TGTATTCCAA                    | 42  |
| UM066   | AATAAATCTTTAT-----                                           | TGTATTCCAA                    | 42  |
| MIT     | TTAAAATCTTAGTCAATCGTATAAAAAGCCCTGATTATAGAGGTATGCATTTATCACAA  |                               | 111 |
| SHEEBA  | -----TTGCAATTATCCCAA                                         |                               | 15  |
| J99     | -----                                                        |                               | 0   |
| Pecan18 | -----                                                        |                               | 0   |
| 26695   | TTGAAATCTTAGCTAATCGCATAAAAAGTTCTGATTATAGGGGCTTACACTTATCCCAA  |                               | 120 |
| Shi417  | TTGAAATCTTATCTAATCGCATAAAAAGCTCTGATTATAGGGGCTTACACTTATCCCAA  |                               | 120 |
| SHI470  | -----                                                        |                               | 0   |
| SAT464  | -----                                                        |                               | 0   |
| SHI169  | -----                                                        |                               | 0   |
| ML2     | -----                                                        |                               | 0   |
| OKI154  | -----                                                        |                               | 0   |
| OKI673  | -----                                                        |                               | 0   |
| OKI828  | -----                                                        |                               | 0   |
|         |                                                              |                               |     |
| CC33C   | CATGATATTTTGTAAATCA-----                                     | AGTTTATATAACACATTTTTAATGTAAGT | 90  |
| OKI128  | CATGACATTTTGTAAATCA-----                                     | AGTTTATATAACACATTTTTAATGTAAGT | 90  |
| 52      | CATGACATTTTGTAGATCA-----                                     | AGTTTATATAACACATTTTTAATGTAAGT | 90  |
| OK113   | CATGACATTTTGTAAATCA-----                                     | AGTTTATATAACACATTTTTAATGTAAGT | 92  |
| OK310   | CATGACATTTTGTAAATCA-----                                     | AGTTTATATAACACATTTTTAATGTAAGT | 90  |
| UM066   | CATGACATTTTGTAAATCA-----                                     | AGTTTATATAACACATTTTTAATGTAAGT | 90  |
| MIT     | CATAACCGCTACACTAAAAAAGAAATTTAAATCATTATCCAAGCTATTTTTGATGAAGTA |                               | 171 |
| SHEEBA  | CACAATCGTTACGATCAAAATAAAATTTAAATCATTATTCAAGCTATTTTTAATGAAGTG |                               | 75  |
| J99     | -----                                                        |                               | 0   |
| Pecan18 | -----                                                        |                               | 0   |
| 26695   | CACAATCGTTACGATCAAAATAAAATTTAAACCATTATTCAAGCTATTTTCAATGAAGTG |                               | 180 |
| Shi417  | CACAATCGTTATGATCAAAATAAAATTTAAACCATTATTCAAGCTATTTTCAATGAAGTG |                               | 180 |
| SHI470  | -----                                                        |                               | 0   |
| SAT464  | -----                                                        |                               | 0   |
| SHI169  | -----                                                        |                               | 0   |
| ML2     | -----                                                        |                               | 0   |
| OKI154  | -----                                                        |                               | 0   |
| OKI673  | -----                                                        |                               | 0   |
| OKI828  | -----                                                        |                               | 0   |

Figure S1

|         |                                                                  |     |
|---------|------------------------------------------------------------------|-----|
| CC33C   | CAATAAAGGCTTTCTTGTTCTTCTTTTAAGCCTTTAGATAAAAACACATCGCAATTTTT      | 150 |
| OKI128  | AAAATAAAGGCTTTCTTGCTTCTTTTAAGCCTTTAGATAAAAATCACATCGCAATCTTT      | 150 |
| 52      | AAAATAAAGGCTTTCTTGTTCTTCTTTTAAGCCTTTAGATAAAAATCACATCGCAATCTTT    | 150 |
| OK113   | AAAATAAAGGCTTTCTTGTTCTTCTTTTAAGCCTTTAGATAAAAATCACATCGCAATCTTT    | 152 |
| OK310   | AAAATAAAGGCTTTCTTGTTCTCTCTTTTAAGCCTTTAGATAAAAATCACATCGCAATCTTT   | 150 |
| UM066   | AAAATAAAGGCTTTCTTGTTCTCTTTTAAGCCTTTAGATAAAAATCACATCGCAATCTTT     | 150 |
| MIT     | GGCA--AAGATTTATTGCAAATCCGCACAACAGATATAAGCAAACGCCCTAACAAATATAG    | 229 |
| SHEEBA  | GGAG--AGGATTTTTTACAAATTCGCACCCTGACATGAGCAAACGCCCCAGCAATATAA      | 133 |
| J99     | -----                                                            | 0   |
| Pecan18 | -----                                                            | 0   |
| 26695   | GGAG--GAGATTTTTTACAAATTCGCACCACCGATATGAGCAAACGCCCTAGCAATATTA     | 238 |
| Sh1417  | GGAG--AAGATTTATTACAAATTCGCACCACCGATATGAGCAAACGCCCTAGCAATATCA     | 238 |
| SHI470  | -----TTTTTACAAATTCGCACCACCGATATGAGCAAACGCCCTAGCAATATCA           | 50  |
| SAT464  | -----TTTTTACAAATTCGCACCACCGATATGAGCAAACGCCCTAGCAATATCA           | 50  |
| SHI169  | -----TTTTTACAAATTCGCACCACCGATATGAGCAAACGCCCTAGCAATATCA           | 50  |
| ML2     | -----                                                            | 0   |
| OKI154  | -----                                                            | 0   |
| OKI673  | -----                                                            | 0   |
| OKI828  | -----                                                            | 0   |
|         |                                                                  |     |
| CC33C   | AAAATACAAACAAATATGTTTATTTTGCCTTTGAGATATTTTCGCATGGTTAAAAGCATC     | 210 |
| OKI128  | AAAATACAAACAAATATGTTTATTTTGCCTTTGAGATATTTTCGCATGGTTAAAAGCATC     | 210 |
| 52      | AAAATACAAACAAATATGTTTATTTTGCCTTTGAGATATTTTCGCATGGTTAAAAGCATC     | 210 |
| OK113   | AAAATACAAACAAATATGTTTATTTTGCCTTTGAGATATTTTCGCATGGTTAAAAGCATC     | 212 |
| OK310   | AAAATACAAACAAATATGTTTATTTTGCCTTTGAGATATTTTCGCATGGTTAAAAGCATC     | 210 |
| UM066   | AAAATACAAACAAATATGTTTATTTTGCCTTTGAGATATTTTCGCATGGTTAAAAGCATC     | 210 |
| MIT     | AT--GGAGAAAAAGTTACT--CAGAAGTAG--TCAATACTAT--                     | 266 |
| SHEEBA  | --C--AGGCCAAGAGATTTATGCAAAAAGTGG--TGGATAATATCTGCAAGTCTGAAATATCTC | 190 |
| J99     | -----                                                            | 0   |
| Pecan18 | -----                                                            | 0   |
| 26695   | T--AGGCCAAGAGATTTATGCAAAAAGTGG--TTGATAATATCTGCAAGTCTGAAATGCCTC   | 295 |
| Sh1417  | T--AGGCCAAGAGGTTTAAAGCAAAAAGTGG--TTGATAGCATCTGCAAGTCTGAAATGCCTC  | 295 |
| SHI470  | T--AGGCCAAGAGGTTTATGTAAAAGTGG--TTGATAATATCTGCAAGTCTGAAATGCCTC    | 107 |
| SAT464  | T--AGGCCAAGAGGTTTATGCAAAAAGTGG--TTGATAGTATCTGCAAGTCTGAAATGCCTC   | 107 |
| SHI169  | TT--AGGCCAAGAGGTTTATGCAAAAAGTGG--TTGATAGTATCTGCAAGTCTGAAATGCCTC  | 108 |
| ML2     | -----                                                            | 0   |
| OKI154  | -----                                                            | 0   |
| OKI673  | -----                                                            | 0   |
| OKI828  | -----                                                            | 0   |
|         |                                                                  |     |
| CC33C   | AATGTAGAT-----TAAATTTTCCCATTTATCCAAAAGATCAAAATCTTCTA             | 257 |
| OKI128  | AATATAGAT-----TAA-----                                           | 222 |
| 52      | AATATAGAT-----TAA-----                                           | 222 |
| OK113   | AATATAGAT-----TAA-----                                           | 224 |
| OK310   | AATATAGAT-----TAA-----                                           | 222 |
| UM066   | AATATAGAT-----TAAKNCARGTNHMYRYAGTVGDTVHCTTAATCTATATT             | 257 |
| MIT     | -----TCATAAAGAAATAGACAGAATGACTCAAGATAGCTTAAGAAAAAATCTTTTTG       | 319 |
| SHEEBA  | AAGATAATTTAGGAAAAAAGAATCAAGTAGCCCAAGATAGTTTGAGGAAAAATCTTTTTG     | 250 |
| J99     | -----GAAAAAGAATCAAGTAACCCAAGACAGCTTGAGAAAAAATCTTTTTG             | 48  |
| Pecan18 | -----GAAAAAGAATCAGGTAACCCAAGATAGCTTGAGAAAAAATCTTTTTG             | 48  |
| 26695   | AAGATAATTCAGGAAAAAAGAATCAAGTAACCCAAGACAGCTTGAGAAAAAATCTTTTTG     | 355 |
| Sh1417  | AAGACAATTTAGGAAAAAAGAATCAAGTAACTCAAGATAGCTTGAGAAAAAATCTTTTTG     | 355 |
| SHI470  | AAGACAATTTAGGAAAAAAGAATCAAGTAACTCAAGATAGCTTGAGAAAAAATCTTTTTG     | 167 |
| SAT464  | AAGACAATTTAGGAAAAAAGAATCAAGTAACTCAAGATAGCTTGAGAAAAAATCTTTTTG     | 167 |
| SHI169  | AAGACAATTTAGGAAAAAAGAATCAAGTAACTCAAGATAGCTTGAGAAAAAATCTTTTTG     | 168 |
| ML2     | -----                                                            | 0   |
| OKI154  | -----                                                            | 0   |
| OKI673  | -----                                                            | 0   |
| OKI828  | -----                                                            | 0   |

Figure S1

|         |                                                               |     |
|---------|---------------------------------------------------------------|-----|
| CC33C   | TAGAGCGGGCCAAACATAAAGGCACAATATG-----GTGCAACTCA                | 298 |
| OKI128  | -----                                                         | 222 |
| 52      | -----                                                         | 222 |
| OK113   | -----                                                         | 224 |
| OK310   | -----                                                         | 222 |
| UM066   | ----GATGCTTTTA--ACCATGCGAAAATAT-----CTCAAACGCA                | 292 |
| MIT     | TGGATATGCATA----GAATGGGGTTGATTGAACGCTACAATAAAACATAAAAAACCCAC  | 374 |
| SHEEBA  | TAGATATGCATA----GAATGGGGTTGATTGAACGCTACAATAAAAAATAAGAGCTTAT   | 305 |
| J99     | TAGATATGCATA----GAATGGGGTTGATTGAGCGATACAATAAAAAATAAGAACCTAC   | 103 |
| Pecan18 | TAGATATGCATA----GAATGGGGTTGATTGAGCGATACAATAAAAAATAAGAACCTAC   | 103 |
| 26695   | TGGATATGCATA----GAATGGGGCTGATTGAACGCTACAATAAAAAATAAGGAACCTAC  | 410 |
| Sh1417  | TGGATATGCATA----GAATGGGGTTGATTGAACGCTACAATAAGAATAAGGAACCTAC   | 410 |
| SHI470  | TGGATATGCATA----GAATGGGGTTGATTGAACGCTACAATAAGAATAAGGAACCTAC   | 222 |
| SAT464  | TGGATATGCATA----GAATGGGGTTGATTGAACGCTACAATAAAAAATAAGGAACCTAT  | 222 |
| SHI169  | TAGATATGCATAGCATAGAAATGGGGTTGATTGAACGCTACAATAAGAATAAGGAACCTAC | 228 |
| ML2     | -----                                                         | 0   |
| OKI154  | -----                                                         | 0   |
| OKI673  | -----                                                         | 0   |
| OKI828  | -----                                                         | 0   |
| CC33C   | AAA--CCCTTTT----CTTTTTTAAC----GCCATGTTTTTCAAATAAAGGGCTTTT     | 346 |
| OKI128  | -----                                                         | 222 |
| 52      | -----                                                         | 222 |
| OK113   | -----                                                         | 224 |
| OK310   | -----                                                         | 222 |
| UM066   | AAATAAACATATTTGTTTGTATTTTAAAGATTGCGATGTGATTTTATCTAAAGGCTTAAA  | 352 |
| MIT     | AAATCCTTATATGAAAAGCCCTATTAATATGTGA----GTTTAAACCCCTTAGCCTTAG   | 430 |
| SHEEBA  | AGACCCCTATATTCAAAGCAATATCAAATATATTC----GTTTAACTCCCTTAGCCATAG  | 361 |
| J99     | AAACCCCTACATCCAAGCAATATTAATATATCA----GTTTAACTCCCTTAGCTATAG    | 159 |
| Pecan18 | AAACCCCTACATCCAAGCAATATTAATATATCA----GTTTAACTCCCTTAGCTATAG    | 159 |
| 26695   | AAACCCCTACATTCAAAGCAATATTAATATATCA----GTTTGACTCCCTTAGCTATAG   | 466 |
| Sh1417  | AAACCCCTACATTCAAAGCAATATTAATATATCA----GTTTAACTCCCTTAGCTATAG   | 466 |
| SHI470  | AAACCCCTACATTCAAAGCAATATTAATATATCA----GTTTAACTCCCTTAGCTATAG   | 278 |
| SAT464  | AAACCCCTACATTCAAAGCAATATTAATATATCA----GTTTAACTCCCTTAGCTATAG   | 278 |
| SHI169  | AAACCCCTACATTCAAAGCAATATTAATATATCA----GTTTAACTCCCTTAGCTATAG   | 284 |
| ML2     | -----                                                         | 0   |
| OKI154  | -----                                                         | 0   |
| OKI673  | -----                                                         | 0   |
| OKI828  | -----                                                         | 0   |
| CC33C   | TCTTTAATGGAGCGTTTGAGTTTTTATCGTTTTGTTTGY---TTT-----C           | 390 |
| OKI128  | -----                                                         | 222 |
| 52      | -----                                                         | 222 |
| OK113   | -----                                                         | 224 |
| OK310   | -----                                                         | 222 |
| UM066   | -----AGAAGAACAAG-----AAAGCCTTATTTTAC-----T                    | 380 |
| MIT     | AATTTTTAAATGCTACTGATTTGTTAAAAGAAAAATTTTGTACACACAAGCCTTAGAAA   | 490 |
| SHEEBA  | AATTTTTAAACGCACAAGATTTGTTAAGAAAAAATTTTGTACACGCAAGCTTAGAAA     | 421 |
| J99     | AATTTTTAAACGCGCAGGATTTGTTAAGAAAAAATTTTGTACACGCAAGCTTAGAAA     | 219 |
| Pecan18 | AATTTTTAAACATGCAGGATTTGTTAAGAAAAAATTTTGTACACGCAAGCTTAGAAA     | 219 |
| 26695   | AATTTTTAAACGCGCAAGATTTGTTAAGAAAAAATTTTGTACACGCAAGCTTAGAAA     | 526 |
| Sh1417  | AATTTTTAAACGTGCAAGATTTGTTAAGAAAAAATTTTGTACACGCAAGCTTAGAAA     | 526 |
| SHI470  | AATTTTTAAACGCGCAAGATTTGTTAAGAAAAAATTTTGTACACGCAAGCTTAGAAA     | 338 |
| SAT464  | AATTTTTAAACGCGCAAGATTTGTTAAGAAAAAATTTTGTACACGCAAGCTTAGAAA     | 338 |
| SHI169  | AATTTTTAAACGCGCAAGATTTGTTAAGAAAAAATTTTGTACACGCAAGCTTAGAAA     | 344 |
| ML2     | -----                                                         | 0   |
| OKI154  | -----                                                         | 0   |
| OKI673  | -----                                                         | 0   |
| OKI828  | -----                                                         | 0   |

Figure S1

|         |                                                                |     |
|---------|----------------------------------------------------------------|-----|
| CC33C   | TTCATTGAGCGTTTTTAAAAATAAGC-----CTCTCTTTATTGGTTTCAAAAAACACG     | 442 |
| OKI128  | -----                                                          | 222 |
| 52      | -----                                                          | 222 |
| OK113   | -----                                                          | 224 |
| OK310   | -----                                                          | 222 |
| UM066   | TACATTA AAAATGTGTTATATAAAC-----TTG-----ATTACAAAA---TG          | 420 |
| MIT     | ATCTTTTAGAGGGTTTTATAGCAGAATGCAGAGAGCTGTTAGTAGAATTAATAGCGAAA    | 550 |
| SHEEBA  | ATCTTTTAAAAGGTTTTGGAGCAGAATGCAGAGAGGTAATGATAGGGCTTGACAATCATC   | 481 |
| J99     | ATCTTTTACAGGGTTTTGGGGCAGAATGCAGAGAGGTGATGATAGAGCTTGAAAATCATT   | 279 |
| Pecan18 | ATCTTTTGAAGGTTTTGGGGCAGAATGCAGAGAGGTGATGATAGAGCTTGACAATCATT    | 279 |
| 26695   | ACCTTTTGAAGGTTTTGGAGCAGAATGCAGAGAGGTAATGATAGAGCTTGACAATCATT    | 586 |
| Shi417  | ATCTTTTGAAGGTTTTGGAGCAGAATGCAGAGAGGTAATGATAGAGCTTGACAACCATT    | 586 |
| SHI470  | ATCTTTTGAAGGTTTTGGAGCAGAATGCAGAGAGATAATGATAGAGCTTGACAACCATT    | 398 |
| SAT464  | ATCTTTTGAAGGTTTTGGAGCAGAATGCAGAGAGGTAATGATAGAGCTTGACAACCATT    | 398 |
| SHI169  | ATCTTTTGAAGGTTTTGGAGCAGAATGCAGAGAGGTAATGATAGAGCTTGACAACCATT    | 404 |
| ML2     | -----                                                          | 0   |
| OKI154  | -----                                                          | 0   |
| OKI673  | -----                                                          | 0   |
| OKI828  | -----                                                          | 0   |
|         |                                                                |     |
| CC33C   | CTTTGTTCTAGCAAGCTAAAAATTTGTTGGGCTTGATTTTTCCAATTATGATAATCTCTC   | 502 |
| OKI128  | -----                                                          | 222 |
| 52      | -----                                                          | 222 |
| OK113   | -----                                                          | 224 |
| OK310   | -----                                                          | 222 |
| UM066   | TCATGTTGAAATATAATAAAGATTTATTGCATT-----CTAAAAACGGCTG            | 466 |
| MIT     | CTTTAAAT-GTTGAAGAAATGATGTTTTTGTCTACTTTTATACATGTA-AAAAATTTTAC   | 608 |
| SHEEBA  | ACTTAGAT-ATTGAAGAAATGATGTTTTTGTACATTTTAAATATT-GAAAATTTTAC      | 539 |
| J99     | ATTTAGAC-ATTGAAGAAATGATGTTTTTGTACATTTTAAATATT-GAAAATTTTAC      | 337 |
| Pecan18 | ATTTAGAC-ATTGAAGAAATGATGTTTTTGTACATTTTAAATATT-GAAAATTTTAC      | 337 |
| 26695   | ATTTAGAC-ATTGAAGAAATGATGTTTTTGTACATTTTAAATATT-GAAAATTTTAC      | 644 |
| Shi417  | ATTTAGAT-ATTGAAGAAATGATGTTTTTGTACATTTTAAATATT-GAAAATTTTAC      | 644 |
| SHI470  | ATTTAGAT-ATTGAAGAAATGATGTTTTTGTACATTTTAAATATT-GAAAATTTTAC      | 456 |
| SAT464  | ATTTAGAT-ATTGAAGAAATGATGTTTTTGTACATTTTAAATATT-GAAAATTTTAC      | 456 |
| SHI169  | ATTTAGAC-ATTGAAGAAATGATGTTTTTGTACATTTTAAATATT-GAAAATTTTAC      | 462 |
| ML2     | -----                                                          | 0   |
| OKI154  | -----                                                          | 0   |
| OKI673  | -----                                                          | 0   |
| OKI828  | -----                                                          | 0   |
|         |                                                                |     |
| CC33C   | TTGTCTAACTTGTTCCCATTA AAAATGGTTAGGGTTACAATAATTTTGGCGTAACTCTTT- | 561 |
| OKI128  | -----                                                          | 222 |
| 52      | -----                                                          | 222 |
| OK113   | -----                                                          | 224 |
| OK310   | -----                                                          | 222 |
| UM066   | A-----                                                         | 467 |
| MIT     | T--AGAGAGATTGTAGAATACATTAAGAATATAGAAGTTTAAGCCGTTTTCAA          | 664 |
| SHEEBA  | T--AGAGAAATTATAGAATATGTTAGAGAATACAGGAGTTTAAGCCGCATCCAAA        | 595 |
| J99     | T--AGAGAAATTATAGAATATGTTAGAGAGTATAGGAGTTTAAGCCGTATCCAAA        | 393 |
| Pecan18 | T--AGAGAAATTATAGAATATGTTAGAGAATATAGGAGCTTAAGCCGTATCCAAA        | 393 |
| 26695   | T--AGAGAAATTATAGAATATGTTAGAGGATATAGGAGTTTAAGCCGCATCCAAA        | 700 |
| Shi417  | T--AGAGAAATTATAGAATATGTTAGAGAATATAGGAGTTTAAGCCGTATCCAAA        | 700 |
| SHI470  | T--AGAGAAATTATAGAATATGTTAGAGAATATAGGAGTTTAAGCCGTATCCAAA        | 512 |
| SAT464  | T--AGAGAAATTATAGAATATGTTAGAGAATATAGGAGTTTAAGCCGTATCCAAA        | 512 |
| SHI169  | T--AGAGAAATTATAGAATATGTTAGAGAATATAGGAGTTTAAGCCGTATCCAAA        | 518 |
| ML2     | -----                                                          | 0   |
| OKI154  | -----                                                          | 0   |
| OKI673  | -----                                                          | 0   |
| OKI828  | -----                                                          | 0   |

|         |                                                                |     |
|---------|----------------------------------------------------------------|-----|
| CC33C   | TAATTTTTCTTTTTGGATACGGCTTAAACTCCTATACTCTCTAACATATT-CTATAATTI   | 620 |
| OKI128  | -----                                                          | 222 |
| 52      | -----                                                          | 222 |
| OK113   | -----                                                          | 224 |
| OK310   | -----                                                          | 222 |
| UM066   | -----                                                          | 467 |
| MIT     | GAGAAAACTTCTTGAATTAGTGCAAAATTATTGTAACCCCTAAAAATTTTGATGGGGATA   | 724 |
| SHEEBA  | AAGAAAAATTTAAAAGAGTCAGTGCAAAATTATTGCAACCCCTAACCATTTTAGTGGGAACA | 655 |
| J99     | AAGAAAAATTTAAAAGAGTTAGCGCAAGATTATTGCAATCCTAATCATTTTAATGGGAATA  | 453 |
| Pecan18 | AAGAAAAATTTAAAAGAGTTAGTGCAAAATTATTGCAACCCCTAACCATTTTAACGGGAATA | 453 |
| 26695   | AAGAAAAATTTAAAAGAGTTAGTGCAAGATTATTGCAACCCCTAACCATTTTAATGGGAATA | 760 |
| Shi417  | AAGAAAAATTTAAAAGAGTTAGTGCAAGATTATTGCAACCCCTAACCATTTTAACGGAAATA | 760 |
| SHI470  | AAGAAAAATTTAAAAGAGTTAGTGCAAGATTATTGTAACCCCTAACCATTTTAACGGAAATA | 572 |
| SAT464  | AAGAAAAATTTAAAAGAGTTAGTGCAAGATTATTGCGACCCCTAACCATTTTAACGGAAATA | 572 |
| SHI169  | AAGAAAAATTTAAAAGAGTTAGTGCAAGATTATTGCGACCCCTAACCATTTTAACGGAAATA | 578 |
| ML2     | -----                                                          | 0   |
| OKI154  | -----                                                          | 0   |
| OKI673  | -----                                                          | 0   |
| OKI828  | -----                                                          | 0   |

|         |                                                              |     |
|---------|--------------------------------------------------------------|-----|
| CC33C   | CGCTTCT--AGTAAAATTTCAATATTTAA--AAACGTAACAAAAACATCATTTCTTCA-  | 676 |
| OKI128  | -----                                                        | 222 |
| 52      | -----                                                        | 222 |
| OK113   | -----                                                        | 224 |
| OK310   | -----                                                        | 222 |
| UM066   | -----                                                        | 467 |
| MIT     | AAACACA--TAAGAGACTATCATAATTGGAAAAATGAAACAGACCAAAATTTTACTTTAC | 782 |
| SHEEBA  | AGTTAAATAAAAGAGATTATCATAATTGGAAAAATCAAGCCCAACAAATTTTAGCTTGC  | 715 |
| J99     | AGTTAGACAAAGAGAGATTATCATAATTGGAAAAATCAAGCCCAACAAATTTTAGCTTGC | 513 |
| Pecan18 | AGCTAGAAAAGAGAGATTATCATAATTGGAAAAATCAAGCCCAACAAATTTTAGCTTGC  | 513 |
| 26695   | AGCTAGAAAAGAGAGATTATCATAATTGGAAAAATCAAGCCCAACAAATTTTAGCTTGC  | 820 |
| Shi417  | AGCTAGAAAAGAGAGATTATCATAATTGGAAAAATCAAGCCCAACAAATTTTAGCTTGC  | 820 |
| SHI470  | AGCTAGAAAAGAGAGATTATCATAATTGGAAAAATCAAGCCCAACAAATTTTAGCTTGC  | 632 |
| SAT464  | AGCTAGAAAAGAGAGATTATCATAATTGGAAAAATCAAGCCCAACAAATTTTAGCTTGC  | 632 |
| SHI169  | AGTTAGAAAAGAGAGATTATCATAATTGGAAAAATCAAGCCCAACAAATTTTAGCTTGC  | 638 |
| ML2     | -----                                                        | 0   |
| OKI154  | -----                                                        | 0   |
| OKI673  | -----                                                        | 0   |
| OKI828  | -----                                                        | 0   |

|         |                                                               |     |
|---------|---------------------------------------------------------------|-----|
| CC33C   | ATGTCTAAATAATGATTTTCAAGCTCTATCATCACCT-----CTCTGCATT           | 722 |
| OKI128  | -----                                                         | 222 |
| 52      | -----                                                         | 222 |
| OK113   | -----                                                         | 224 |
| OK310   | -----                                                         | 222 |
| UM066   | -----                                                         | 467 |
| MIT     | TAGAACAAAGCGTATTTTTTGAAGAGATAAAAAACAAGCTTATTTTAAGAATGCTAGACA  | 842 |
| SHEEBA  | TAGAACAAAGCGTATTTTTTGAACCAATAAAGAGAGGGCTTATTTTGAACACGATCAGTG  | 775 |
| J99     | TAGAACAAAGCGTGTTTTTTGAACCAATAAAGAGAGGGCTTATTTTAAAAACGCTCAATG  | 573 |
| Pecan18 | TAGAACAAAGCGTGTTTTTTGAACCAATAAAGAGAGGGCTTATTTTAAAAACGCTCAATG  | 573 |
| 26695   | TAGAACAAAGCGTGTTTTTTGAACCAATAAAGAGAGGGCTTATTTTAAAAAGCGCTCAATG | 880 |
| Shi417  | TAGAACAAAGCGTGTTTTTTGAACCAATAAAGAGAGGGCTTATTTTAAAAACGCTCAATG  | 880 |
| SHI470  | TAGAACAAAGCGTGTTTTTTGAACCAATAAAGAGAGGGCTTATTTTAAAAACGCTCAATG  | 692 |
| SAT464  | TAGAACAAAGCGTGTTTTTTGAACCAATAAAGAGAGGGCTTATTTTAAAAACGCTCAATG  | 692 |
| SHI169  | TAGAACAAAGCGTGTTTTTTGAACCAATAAAGAGAGGGCTTATTTTAAAAACGCTCAATG  | 698 |
| ML2     | -----                                                         | 0   |
| OKI154  | -----                                                         | 0   |
| OKI673  | -----                                                         | 0   |
| OKI828  | -----                                                         | 0   |

|         |                                                               |      |
|---------|---------------------------------------------------------------|------|
| CC33C   | CTGCCCCAAAACCTTGT-AAAAGATTTTCTAAAGCTTGGGTGTAACAAAAATTTTTCTT   | 781  |
| OKI128  | -----                                                         | 222  |
| S2      | -----                                                         | 222  |
| OK113   | -----                                                         | 224  |
| OK310   | -----                                                         | 222  |
| UM066   | -----                                                         | 467  |
| MIT     | AAGAAAAATAACAAAGCGATAGAAAGCTCAAACGCTCTATTAAGAAAAAGCCCTTTATT   | 902  |
| SHEEBA  | AAGAAAACAAACAAAACGATAAAAAAGCTCAAACGCTCCATTAAGAAAAAGCCCTTTATT  | 835  |
| J99     | AAGAAAACAAACAAAACGATAAAAAAGCTCAAACGCTCCATTAAGAAAAAGCCCTTTATT  | 633  |
| Pecan18 | AAGAAAACAAACAAAACGATAAAAAAGCTCAAACGCTCTATTAAGAGAAAAGCCCTTTATT | 633  |
| 26695   | AAGAAAACAAACAAAACGATAAAAAAGCTCAAACGCTCTATTAAGAGAAAAGCCCTTTATT | 940  |
| Sh1417  | AAGAAAACAAACAAAACGATAAAAAAGCTCAAACGCTCTATTAAGAGAAAAGCCCTTTATT | 940  |
| SH1470  | AAGAAAACAAACAAAACGATAAAAAAGCTCAAACGCTCTATTAAGAGAAAAGCCCTTTATT | 752  |
| SAT464  | AAGAAAACAAACAAAACGATAAAAAAGCTCAAACGCTCTATTAAGAGAAAAGCCCTTTATT | 752  |
| SH1169  | AAGAAAACAAACAAAACGATAAAAAAGCTCAAACGCTCTATTAAGAGAAAAGCCCTTTATT | 758  |
| ML2     | -----                                                         | 0    |
| OKI154  | -----                                                         | 0    |
| OKI673  | -----                                                         | 0    |
| OKI828  | -----                                                         | 0    |
| CC33C   | AACAAATCTTGGCGCTTTAAAAATTCTATAGATAAGGGAGTTAGATTAAATATATTTGATA | 841  |
| OKI128  | -----                                                         | 222  |
| S2      | -----                                                         | 222  |
| OK113   | -----                                                         | 224  |
| OK310   | -----                                                         | 222  |
| UM066   | -----                                                         | 467  |
| MIT     | TTGAAAAACACAGCGTTAAAAA-AGAA-AAAGGCTTTGAATTGCACCACATTGTGCCTTT  | 960  |
| SHEEBA  | TTGAAAAACATGGCGTAAAAA-AGAA-AAAGGCTTTGAGTTGCACCATATTGTGCCTTT   | 893  |
| J99     | TTGAAAAACATGGCGTAAAAA-AGAA-AAAGGCTTTGAGTTGCATCATATTGTGCCTTT   | 692  |
| Pecan18 | TTGAAAAACATGGCGTAAAAA-AGAA-AAAGGCTTTGAATTGCACCATATTGTGCCTTT   | 691  |
| 26695   | TTGAAAAACATGGCGTAAAAA-AGAA-AAAGGCTTTGAATTGCACCACATTGTGCCTTT   | 998  |
| Sh1417  | TTGAAAAACATGGCGTAAAAA-AGAA-AAAGGCTTTGAATTGCACCATATTGTGCCTTT   | 998  |
| SH1470  | TTGAAAAACATGGCGTAAAAA-AGAA-AAAGGCTTTGAATTGCACCATATTGTGCCTTT   | 810  |
| SAT464  | TTGAAAAACATGGCGTAAAAA-AGAA-AAAGGCTTTGAATTGCACCATATTGTGCCTTT   | 810  |
| SH1169  | TTGAAAAACATGGCGTAAAAA-AGAA-AAAGGCTTTGAATTGCACCATATTGTGCCTTT   | 816  |
| ML2     | -----                                                         | 0    |
| OKI154  | -----                                                         | 0    |
| OKI673  | -----                                                         | 0    |
| OKI828  | -----                                                         | 0    |
| CC33C   | TTG-----CTTGAATGTAGGGGTTTGTAGGTTTCTTAT                        | 875  |
| OKI128  | -----                                                         | 222  |
| S2      | -----                                                         | 222  |
| OK113   | -----                                                         | 224  |
| OK310   | -----                                                         | 222  |
| UM066   | -----                                                         | 467  |
| MIT     | ATGTTTGGCTCGCTC---TATAGAAGAATTTGATCTTTTGGATAAATGGGAAAATTTAAT  | 1017 |
| SHEEBA  | GTGTTTGGCTCGCTCTTCTATAGAAGAGTTTGTATCTTTTGGATAAATGGGAAAATTTAAT | 953  |
| J99     | ATGTTTGGCTCGCTC---TATAGAAGAGTTTGTATCTTTTGGATAAATGGGAAAATTTAAT | 749  |
| Pecan18 | ATGCTTGGCTCGCTC---TATAGAAGAATTTGATCTTTTGGATAAATGGGAGAAATTTAAT | 748  |
| 26695   | ATGCTTGGCTCGCTC---TATAGAAGAATTTGTATCTTTTGGATAAATGGGAAAATTTAAT | 1055 |
| Sh1417  | ATGCTTGGCTCGCTC---TATAGAAGAATTTGTATCTTTTGGATAAATGGGAAAATTTAAT | 1055 |
| SH1470  | ATGCTTGGCTCGCTC---TATAGAAGAATTTGTATCTTTTGGATAAATGGGAAAATTTAAT | 867  |
| SAT464  | ATGCTTGGCTCGCTC---TATAGAAGAATTTGTATCTTTTGGATAAATGGGAAAATTTAAT | 867  |
| SH1169  | ATGCTTGGCTCGCTC---TATAGAAGAATTTGTATCTTTTGGATAAATGGGAAAATTTAAT | 873  |
| ML2     | -----TTAAT                                                    | 5    |
| OKI154  | -----TTAAT                                                    | 5    |
| OKI673  | -----TTAAT                                                    | 5    |
| OKI828  | -----TTAAT                                                    | 5    |

|         |                                                               |      |
|---------|---------------------------------------------------------------|------|
| CC33C   | TTTTATTGATCGCTCAATCAACCCCATTTCTGTGCATATCTACAAAAAGATTTTTTCTCA  | 935  |
| OKI128  | -----                                                         | 222  |
| 52      | -----                                                         | 222  |
| OK113   | -----                                                         | 224  |
| OK310   | -----                                                         | 222  |
| UM066   | -----                                                         | 467  |
| MIT     | TTACATTGATGCCITTAACCATGCGAAAGATTTCTCAAACACAAAAAAGCACATTTGTTT  | 1077 |
| SHEEBA  | CTATATTGACGCTTTAACCATGCGAAAAATATCTCAAACACAAAAAATAACATATTTGTTT | 1013 |
| J99     | CTATATTGACGCTTTAACCATGCGAAGATATCTCAAACGCAAAAATAACATCTTTGTTT   | 809  |
| Pecan18 | CTATATTGATGCTTTAACCATGCGAAAAATATCTCAAACGCAAAAATAACATATTTGTTT  | 808  |
| 26695   | CTATATTGACGCTTTAACCATGCGAAGATATCTCAAACGCAAAAATAACATATTTGTTT   | 1115 |
| Sh1417  | CTATATTGATGCTTTAACCATGCGAAAAATATCTCAAACGCAAAAATAACATATTTGTTT  | 1115 |
| SHI470  | CTATATTGATGCTTTAACCATGCGAAAAATATCTCAAACGCAAAAATAACATATTTGTTT  | 927  |
| SAT464  | CTATATTGATGCTTTAACCATGCGAAAAATATCTCAAACGCAAAAATAACATATTTGTTT  | 927  |
| SHI169  | CTATATTGATGCTTTAACCATGCGAAAAATATCTCAAACGCAAAAATAACATATTTGTTT  | 933  |
| ML2     | CTATATTGATGCTTTAACCATGCGAAAAATATCTCAAACGCAAAAATAACATATTTGTTT  | 65   |
| OKI154  | CTATATTGATGCTTTAACCATGCGAAAAATATCTCAAACGCAAAAATAACATATTTGTTT  | 65   |
| OKI673  | CTATATTGATGCTTTAACCATGCGAAAAATATCTCAAACGCAAAAATAACATATTTGTTT  | 65   |
| OKI828  | CTATATTGATGCTTTAACCATGCGAAAAATATCTCAAACGCAAAAATAACATATTTGTTT  | 65   |
| CC33C   | AGCTGCTTTGGGTTACTTGATTCTTTTTTCGTGAAGTGCCCAA-----              | 978  |
| OKI128  | -----                                                         | 222  |
| 52      | -----                                                         | 222  |
| OK113   | -----                                                         | 224  |
| OK310   | -----                                                         | 222  |
| UM066   | -----                                                         | 467  |
| MIT     | GTATTTTCAAGATTGTGATGTAATTTTATCTAAAGGCTCAAAGAAGAACAAGAACGCAT   | 1137 |
| SHEEBA  | GTATTTTAAAAATTGCGATGTGATCTTATCTAAAGGCTTCAAAGAAGAACAAGAAAGCCT  | 1073 |
| J99     | GTATTTTAAAAATTGCGATGTGATTTTATCTAAAGGCTTAAAAGAAGAACAAGAAAGCCT  | 869  |
| Pecan18 | GTATTTTAAAAATTGCGATGTGATTTTATCTAAAGGCTTAAAAGAAGAACAAGAAAGCCT  | 868  |
| 26695   | GTATTTTAAAAATTGCGATGTGATTTTATCTAAAGGCTTAAAAGAAGAACAAGAAAGCCT  | 1175 |
| Sh1417  | GTATTTTAAAAATTGCGATGTGATTTTATCTAAAGGCTTAAAAGAAGAACAAGAAAGCCT  | 1175 |
| SHI470  | GTATTTTAAAGATTGCGATGTGATTTTATCTAAAGGCTTAAAAGAAGAACAAGAAAGCCT  | 987  |
| SAT464  | GTATTTTAAAAATTGCGATGTGATTTTATCTAAAGGCTTAAAAGAAGAACAAGAAAGCCT  | 987  |
| SHI169  | GTATTTTAAAGATTGCGATGTGATTTTATCTAAAGGCTTAAAAGAAGAACAAGAAAGCCT  | 993  |
| ML2     | GTATTTTAAAGATTGCGATGTGATTTTATCTAAAGGCTTAAAAGAAGAGCAAGAAAGCCT  | 125  |
| OKI154  | GTATTTTAAAGATTGCGATGTGATTTTATCTAAAGGCTTAAAAGAAGCACAAGAAAGCCT  | 125  |
| OKI673  | GTATTTTAAAGATTGCGATGTGATTTTATCTAAAGGCTTAAAAGAAGCACAAGAAAGCCT  | 125  |
| OKI828  | GTATTTTAAAGATTGCGATGTGATTTTATCTAAAGGCTTAAAAGAAGCACAAGAAAGCCT  | 125  |
| CC33C   | -----                                                         | 978  |
| OKI128  | -----                                                         | 222  |
| 52      | -----                                                         | 222  |
| OK113   | -----                                                         | 224  |
| OK310   | -----                                                         | 222  |
| UM066   | -----                                                         | 467  |
| MIT     | TTATTTTACTTATCTTAAAAATGTATTGTATAAACTTGATTTACAAAATATCATGCTGAA  | 1197 |
| SHEEBA  | TTATTTGACTTACATTGAAAATGTATCCTATAAACTTGATTTGCAAAATACCATGTTGGA  | 1133 |
| J99     | TTATTTTACTTATATTGGAAATGTGTTATATAAACTTGATTTACAAAATATCATGCTGAA  | 929  |
| Pecan18 | TTATTTTACTTACATTAAAAATGTGTTATATAAACTTGATTTACAAAGTATCATGCTGGA  | 928  |
| 26695   | TTATTTTACTTACATTGAAAATGTGTTATATAAACTTGATTTACAAAATGCCATGTTAAA  | 1235 |
| Sh1417  | TTATTTTACTTGCATTAAAAATGTGTTATATAAACTTGATTTACAAAATGTCATGTTGAA  | 1235 |
| SHI470  | TTATTTTACTTGCATTAAAAATGTGTTATATAAACTTGATTTACAAAATGTCATGTTGAA  | 1047 |
| SAT464  | TTATTTTACTTGCATTAAAAATGTGTTATATAAACTTGATTTACAAAATGCCATGTTGAA  | 1047 |
| SHI169  | TTATTTTACTTGCATTAAAAATGTGTTATATAAACTTGATTTACAAAATATCATGTTGGA  | 1053 |
| ML2     | TTATTTTACTTACATTAAAAATGTGTTATATAAACTTGATTTACAAAATGCCATGTTGGA  | 185  |
| OKI154  | TTATTTTACTTACATTAAAAATGTGTTATATAAACTTGATTTACAAAATGTCATGTTGGA  | 185  |
| OKI673  | TTATTTTACTTACATTAAAAATGTGTTATATAAACTTGATTTACAAAATGTCATGTTGGA  | 185  |
| OKI828  | TTATTTTACTTACATTAAAAATGTGTTATATAAACTTGATTTACAAAATATCATGTTGGA  | 185  |

# Figure S1

|         |                                            |      |
|---------|--------------------------------------------|------|
| CC33C   | -----                                      | 978  |
| OKI128  | -----                                      | 222  |
| 52      | -----                                      | 222  |
| OK113   | -----                                      | 224  |
| OK310   | -----                                      | 222  |
| UM066   | -----                                      | 467  |
| MIT     | ATATAATAGCGATTTATTGCATTCTAAAAA-----        | 1227 |
| SHEEBA  | ATACAATAAAGATCTATTGCATTCTAAAAACGGCTGA----- | 1170 |
| J99     | ATACAATAAAGATTTATTGCATTCTAAAAACGGCTGA----- | 966  |
| Pecan18 | ATACAATAAAGATTTATTGCATTCTAAAAACGGCTGA----- | 965  |
| 26695   | ATACAATAAAGATTTATTGCATTCTAAAAACGGCTGA----- | 1272 |
| Shi417  | ATACAATAAAGATTTATTGCATTCTAAAAACGGCTG-----  | 1271 |
| SHI470  | ATACAATAAAGATTTATTGCATTCTAAAAACGGCTGA----- | 1084 |
| SAT464  | ATACAATAAAGATTTATTGCATTCTAAAAACGGCTGA----- | 1084 |
| SHI169  | ATACAATAAAGATTTATTGCATTCTAAAAACGGCTGA----- | 1090 |
| ML2     | ATACAATAAAGATTTATTGCATTCTAAAAACGGCTGA----- | 222  |
| OKI154  | ATACAATAAAGATTTATTGCATTCTAAAAACGGCTGA----- | 222  |
| OKI673  | ATACAATAAAGATTTATTGCATTCTAAAAACGGCTGA----- | 222  |
| OKI828  | ATACAATAAAGATTTATTGCATTCTAAAAACGGCTGA----- | 233  |

**Figure S1. Multiple DNA sequence alignment of *R.hpyAll* gene in the sequenced *H. pylori* strains which lack the cognate *M1.hpyAll* and *M2.hpyAll* or *M1.hpyAll* alone methyltransferases in their genomes. *H. pylori* 26695 strain contains the full length active copy of *R.hpyAll* gene (1272 bp) while in other strains truncated versions are present. 16 strains which are negative for *M1.hpyAll* and *M2.hpyAll* genes and 2 strains (Pecan18 and CC33C) which are positive for *R.hpyAll* and *M2.hpyAll* but negative for *M1.hpyAll* were used for the alignment. Gene sequences were downloaded from NCBI database and alignment performed using CLUSTAL Omega server.**



**Figure S2**

**(A)**

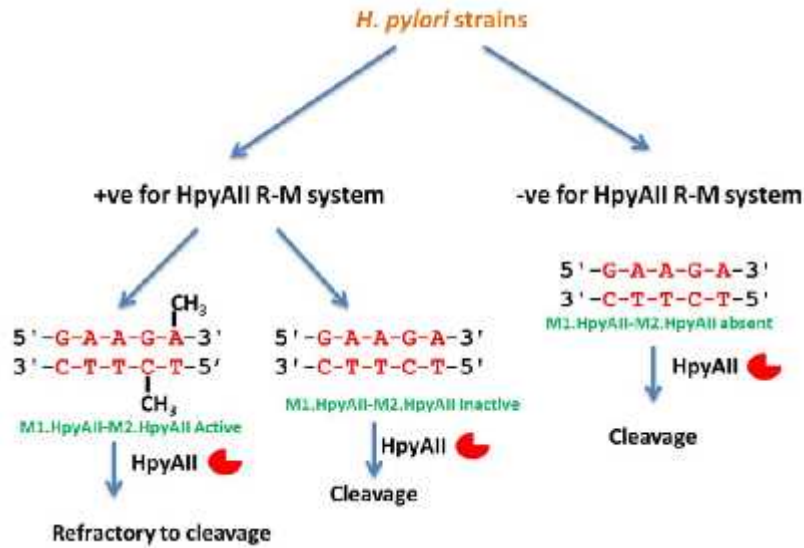

**(B)**

|        | San49 |   |   | I-91 |   |   | Osc40 |   |   | D34 |   |   | I-21 |   |   | I-62 |   |   | 216 (1A) |   |   |   |
|--------|-------|---|---|------|---|---|-------|---|---|-----|---|---|------|---|---|------|---|---|----------|---|---|---|
| HpyAll | -     | + | - | -    | + | - | -     | + | - | -   | + | - | -    | + | - | -    | + | - | -        | + |   |   |
| pUC18  | +     | + | - | +    | + | - | +     | + | - | +   | + | M | M    | - | + | +    | - | + | +        | - | + | + |

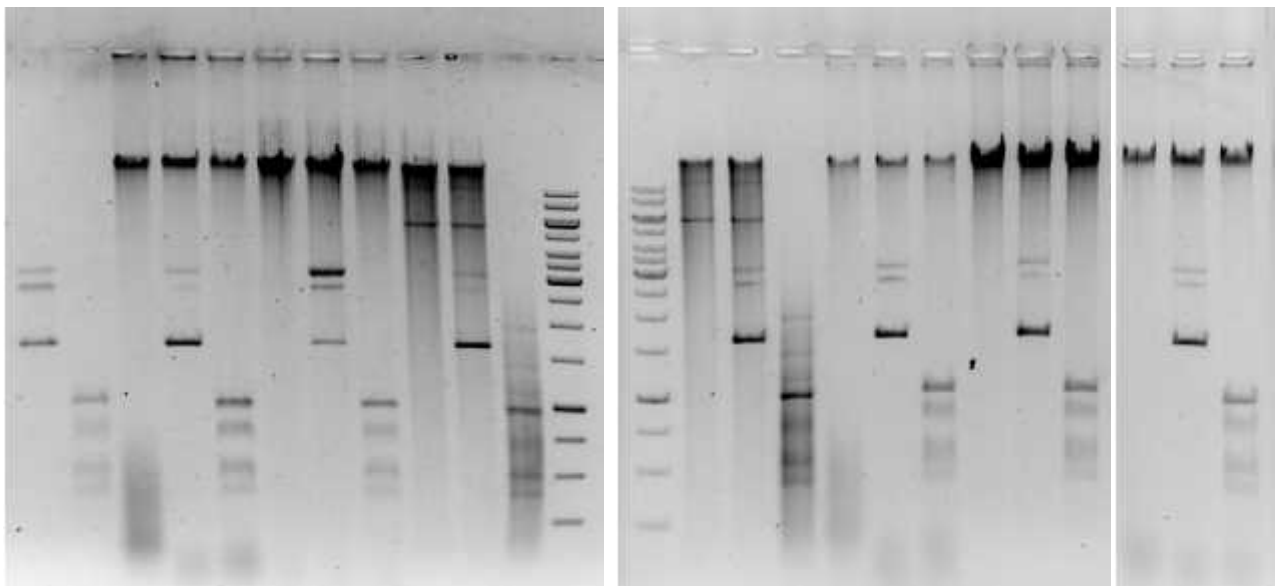

**Figure S2. Activity analysis of M1.HpyAll and M2.HpyAll MTases in the Indian *H. pylori* clinical isolates.** Genomic DNA was isolated as described in materials and method section. *In vitro* digestion with purified HpyAll was performed to check the activity status of M1.HpyAll and M2.HpyAll MTases. **(A)** Genomic DNA of the strains harboring active M1.HpyAll-M2.HpyAll MTases will be refractory to HpyAll cleavage. In contrast the genomic DNA of the strains lacking or harboring inactive M1.HpyAll-M2.HpyAll MTases will be cleaved *in vitro* by HpyAll. **(B)** Genomic DNA from seven Indian isolates was digested to HpyAll cleavage. Two *H. pylori* Indian isolates (D34 and Osc40) which are negative for HpyAll R-M system as expected were found to be susceptible to HpyAll cleavage.

**Figure S3**

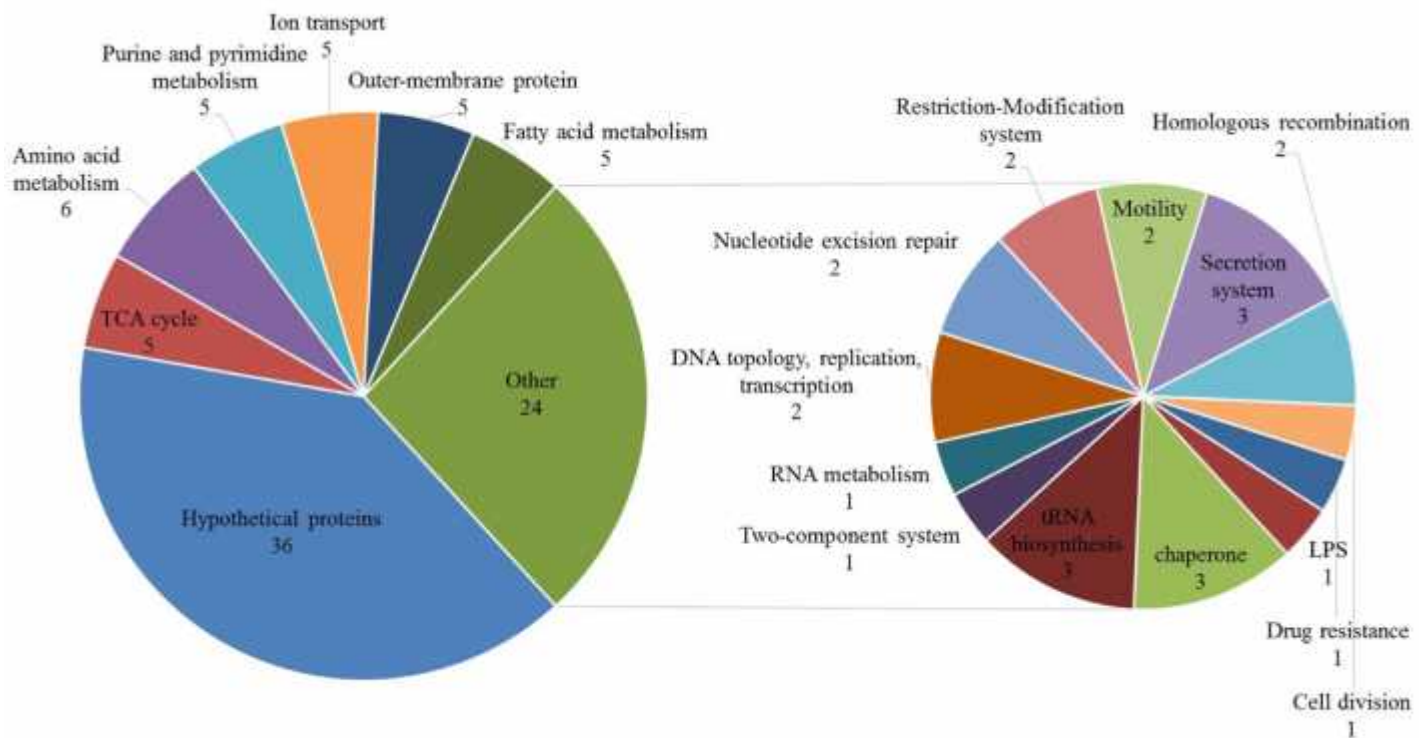

**Figure S3 Analysis of 5' TCTTC 3' motifs in the promoter region of *H. pylori* 26695 strain.** 50 nucleotides region upstream of the known TSS of *H. pylori* 26695 strain was screened for the distribution of 5' TCTTC 3' sites. Genes which harbor 5' TCTTC 3' motif in the promoter region were classified according to the pathway and shown in the form of pie chart. Pathway classification was performed using gene ontology from KEGG database. Numbers in the pie chart indicate number of genes harboring 5' TCTTC 3' site.

**Figure S4**

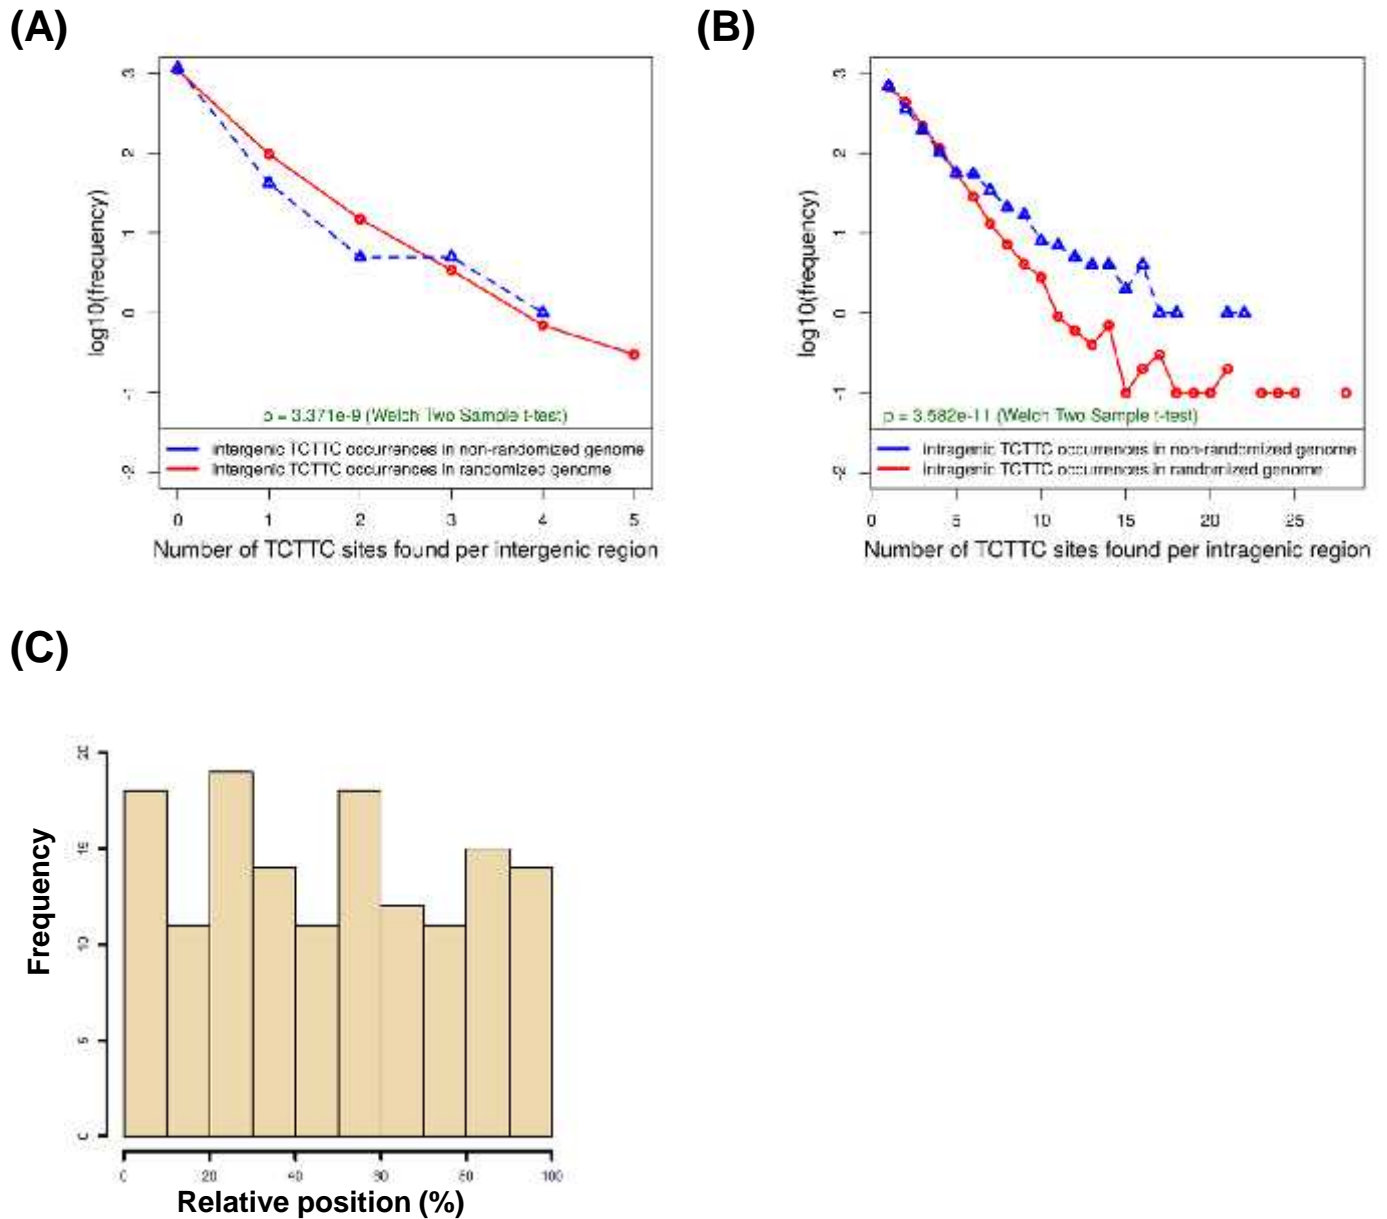

**Figure S4. Analysis of intergenic and intragenic region of *H. pylori* 26695 strain for 5' TCTTC 3' site distribution.** Frequency distribution of TCTTC sites were examined in intergenic and intragenic region of the genome. Blue dotted line indicates the distribution of TCTTC sites in the actual *H. pylori* intergenic or intragenic region. Red solid line indicates the distribution pattern in the randomized data set (n=10). P-values were calculated using Welch Two Sample T- test. Panel **(A)** and **(B)** site distribution in intergenic and intragenic region. **(C)** Frequency distribution of TCTTC sites in the intergenic dsDNA regions containing at least one site.

## Figure S5

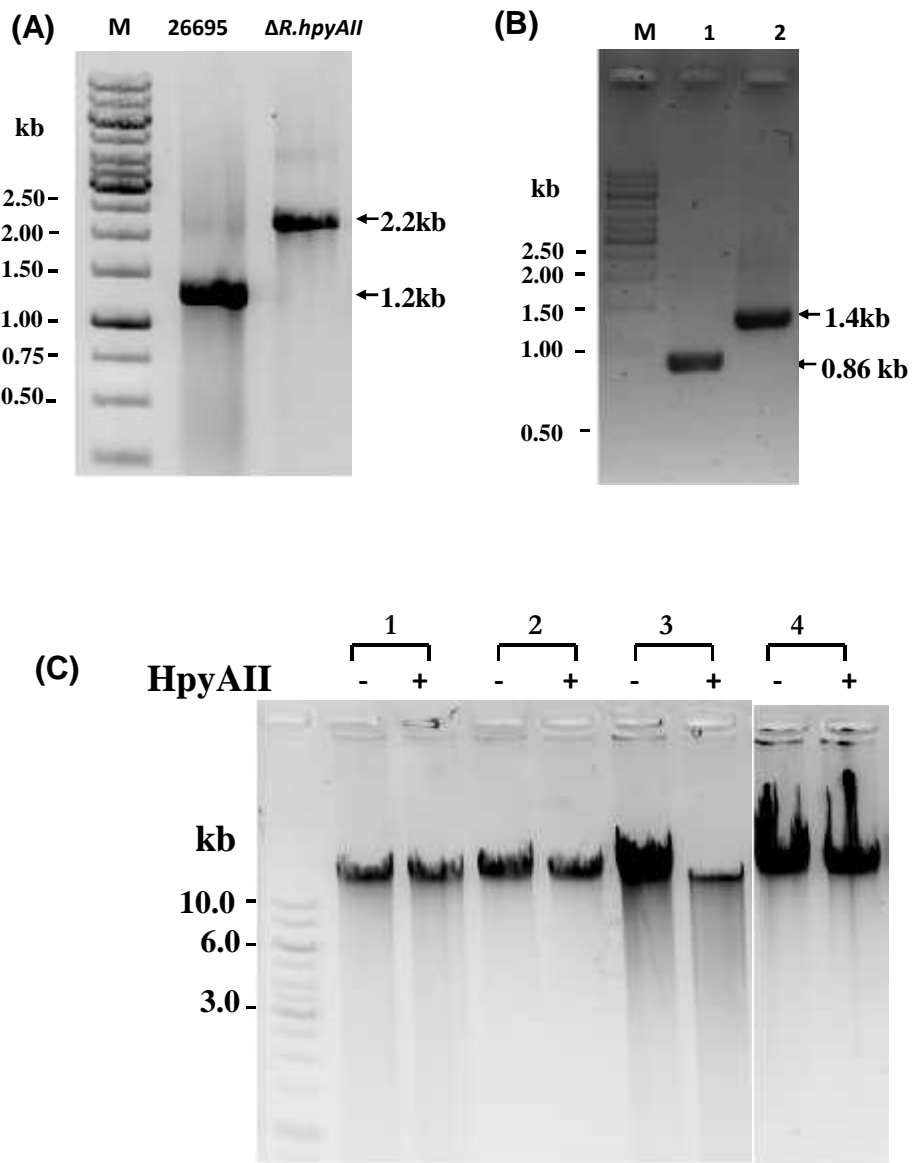

**Figure S5. Stepwise deletion of M2.hpyAll gene in *H. pylori* 26695 strain.** PCR confirmation of *R.hpyAll* gene deletion in **(A)** Strain 26695, PCR amplification using genomic DNA of wild-type and deletion strain was performed to confirm the deletion of *R.hpyAll* using gene specific primers (Table S2). Amplification of 1.27 kb product was observed in the wild type strain as compared to the 2.27 kb product amplified from the deletion strain. **(B)** Deletion of *M1.hpyAll*-*M2.hpyAll* genes in *H. pylori* strain 26695 was confirmed using primers 3 and 4 (Table S2). PCR product of size 1.637 kb in wild-type and 2.453 kb in deletion strain was observed. Lane 1: Strain 26695, lane 2: *R.hpyAll*, **(C)** Loss of DNA methylation at GAAGA/TCTTC sites was confirmed by *in vitro* digestion with *HpyAII* endonuclease. Wild-type and deletions strains were subjected to *in vitro* digestion and digestion pattern were compared. Lane 1: wild-type 26695, lane 2: *R.hpyAll*, lane 3: *R.hpyAll*-*M2.hpyAll*, and lane 4: *R.hpyAll*-*M2.hpyAll::kan::M2.hpyAll*,

Figure S6

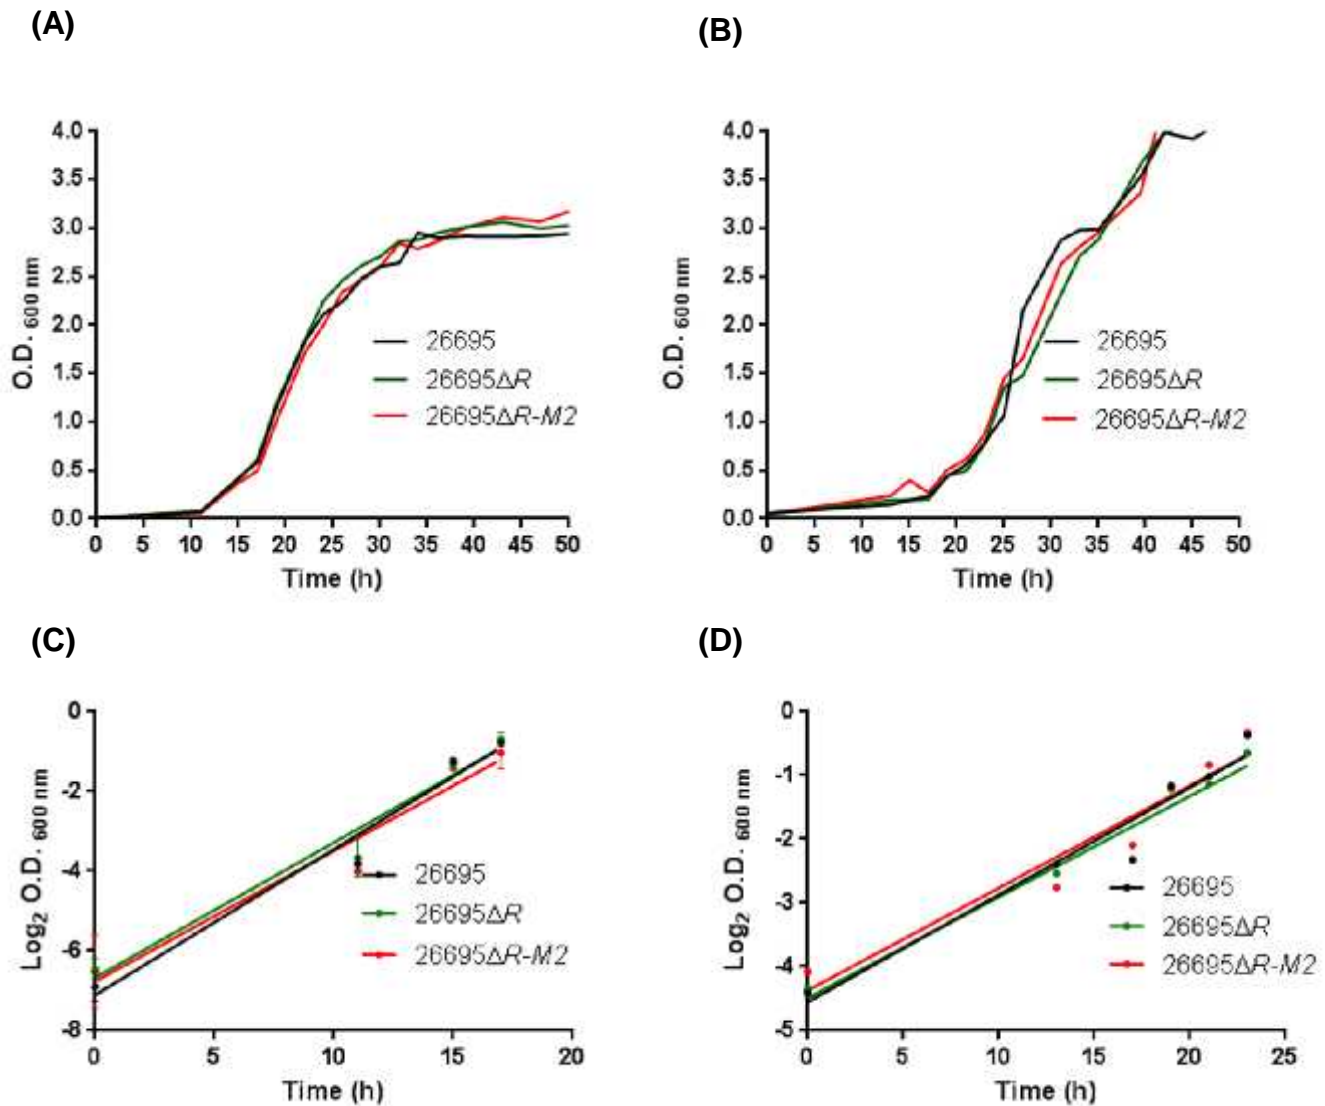

**Figure S6. Growth profile analysis of *H. pylori* wild-type and HpyAll R-M system deletion strains in neutral and acidic growth medium .** Wild-type and deletion strains were cultured in BHI broth containing 8% horse serum, 0.2% Iso-vitaleX, vancomycin (6  $\mu\text{g ml}^{-1}$ ), trimethoprim (8  $\mu\text{g ml}^{-1}$ ), and amphotericin B (8  $\mu\text{g ml}^{-1}$ ) at pH 7.2 or pH 4.5. The optical density (O.D.) at 600 nm was measured. **(A)** Growth in neutral medium (pH 7.2), **(B)** growth in acidic (pH 4.5) medium. Data represents the median values of 3 independent experiments. Generation time of *H. pylori* strains was estimated by plotting the values of linear range from Log<sub>2</sub>O.D.<sub>600</sub> values vs time. Straight line was fitted to the curve and generation time was calculated from the inverse of the slope (growth rate). **(C)** and **(D)** Generation time in neutral and acidic growth conditions.

**Figure S7**

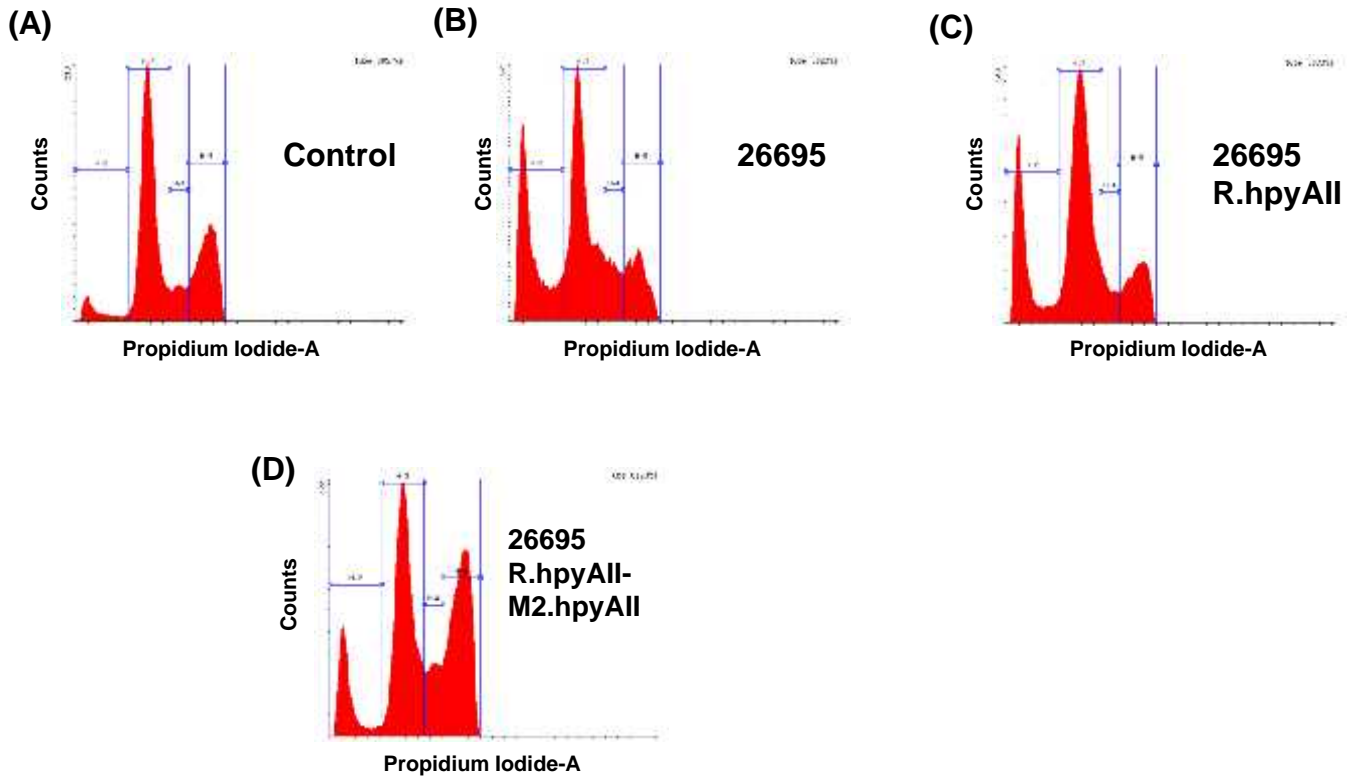

**Figure S7. Loss of m4C modification reduces *H. pylori*-induced apoptosis of the host AGS cells.** Cell cycle progression of control or *H. pylori* treated (24h coculture) AGS cells was monitored by propidium iodide staining and flow cytometry analysis. Results are presented as histograms showing the distribution of cells in different cell cycle phases (n= 3).

**Figure S8**

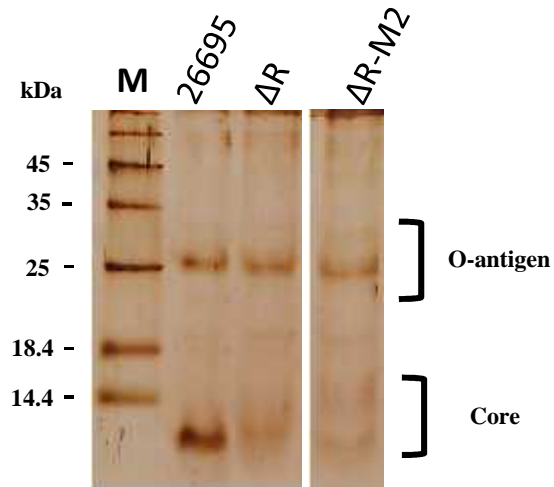

**Figure S8. Effect of m4C modification on lipopolysaccharide profile of *H. pylori*.** lipopolysaccharide profile of *H. pylori* 26695, *R.hpyAll*, *R.hpyAll-M2.hpyAll* gene deletion strains. Lipopolysaccharide (LPS) was isolated from the *H. pylori* strains and detected by silver-staining on 15 % SDS-PAGE.

Figure S9

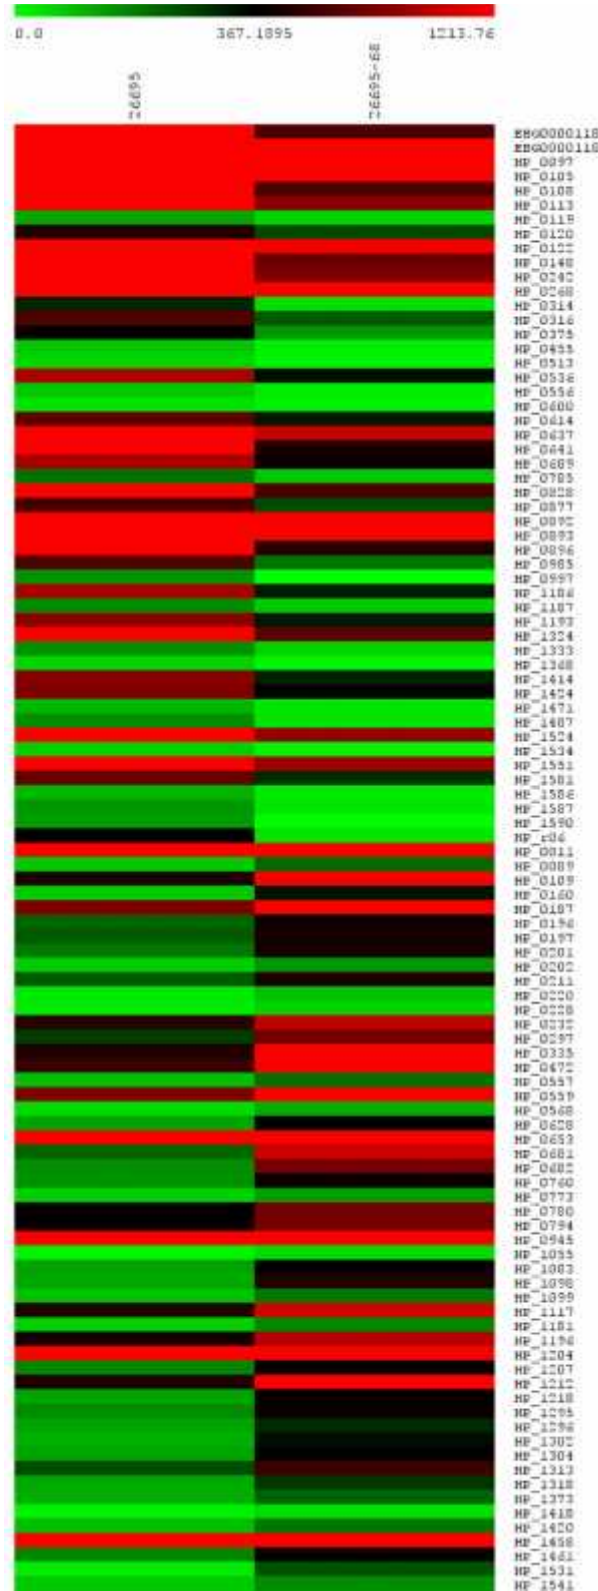

**Figure S9. Global transcription regulation in *H. pylori* 26695 strain by N<sup>4</sup> cytosine methylation.** Heat map depicting the differential gene expression in *R.hpyAll-M2.hpyAll* deletion strain compared to 26695 wild-type strain. Left panel indicates the transcripts expressed in the 26695 wild-type strain, right panel indicates the transcripts expressed in the *R.hpyAll-M2.hpyAll* deletion strain.



**Table S1. List of primers used in the study**

| Primer number | Primer       | Nucleotide Sequence 5'-3'                                        |
|---------------|--------------|------------------------------------------------------------------|
| 1             | hpyAll F     | CATATGATGCCAAAATTAGAAAAAATTTTGC                                  |
| 2             | hpyAll R     | GGATCC TCAGCCGTTTTTAGAATGCAAT                                    |
| 3             | M1.hpyAll F  | TTGATTTTGAATAAGATTTATATAG                                        |
| 4             | M1.hpyAll R  | TTATTCGCATTCATTATAC                                              |
| 5             | M2.hpyAll F  | TTGAATATCAATAAAGTGTTTTA                                          |
| 6             | M2.hpyAll R  | TTATTCAAATCAAACAAGTTTCC                                          |
| 7             | P1hpyAll     | CAATATTAATATATCAGTTTGACTCCCTTAG                                  |
| 8             | P2hpyAll     | AGAAAAGCCTTGCCATGGAGGCCCGCCAATCACGCTTTGTTCTAGCAAGC<br>TAAAAATTTG |
| 9             | P3hpyAll     | TGCGCTAAAGGCTATTTTTTAGAA GAGAAAGCCCTTTATTTTGAAAAAC               |
| 10            | P4hpyAll     | GTATTTAACATGGCATTGTTAAATC                                        |
| 11            | P1M1.M2      | GAAGAGTTTTAACATTTTCTTACG                                         |
| 12            | P2M1.M2      | GGATCGGGCCTTGATGTTACCCGAGAGCTTTTGTGAAGTGATTTCCCAC                |
| 13            | P3M1.M2      | GTAACTGTTAATTGTCCTTGTTCAAGG GGTAAGTTATGCATTAATGTGCCT<br>TTAATG   |
| 14            | P4M1.M2      | CCTTAAGGTTGTCCCGCTC                                              |
| 15            | P1M2         | CCTTAAGGTTGTCCCGCTC                                              |
| 16            | P2M2         | GGATCGGGCCTTGATGTTACCCGAGAGCTGAACATTTTAGGTTTGTTTTTT<br>AGC       |
| 17            | P3M2         | GTAACTGTTAATTGTCCTTGTTCAAGG CTAGATGTCTATATTTGG                   |
| 18            | Cam F        | ATTGGCGGGCCTCCATGGCAAGGCTTTTCT                                   |
| 19            | Cam R        | TTCTAAAAAATAGCCTTTAGCGCA                                         |
| 20            | Gen F        | AGCTCTCGGGTAACATCAAGG                                            |
| 21            | Gen R        | CCTTGAACAAGGACAATTAACAGTTA                                       |
| 22            | Sm1          | GGATCCATTATAACGCTCCTTAAAAAACATAGG                                |
| 23            | Sm2          | CTCGAGTTATTCAAATCAAACAAGTTTCCTAGTTTTTGC                          |
| 24            | Sm3          | AGGAGCGTTATAATGGATCCTTATTCCTCCTAGTTAGTCAGGTACC                   |
| 25            | Sm4          | GTTTGATTTTGAATAACTCGAGATGGCTAAAATGAGAATATCACCGG                  |
| 26            | Rdx F (-100) | ATTTGAGCATGGGGCAGATTTTAAG                                        |
| 27            | Rdx R (-100) | CCCTAAAAGAGCGATTAACCATTC                                         |

**Table S2 Summary of the protein spots identified by LC-MS/MS analysis from the 2D PAGE gel.** Proteins spots which are differentially expressed in *R.hpyAll-M2.hpyAll* deletion strain compared to *R.hpyAll* and *R.hpyAll-M1.hpyAll-M2.hpyAll* gene deletion *H. pylori* 26695 strains.

| Spot | S.No | Protein name                                   | Molecular weight (kDA) | pI   | Coverage (percentage) |
|------|------|------------------------------------------------|------------------------|------|-----------------------|
| 1-2  | 1    | Co-chaperone GroES                             | 13.0                   | 6.6  | 25.42                 |
|      | 2    | Thiol peroxidase                               | 18.3                   | 5.7  | 34.94                 |
|      | 3    | peptidyl-prolyl cis-trans isomerase B          | 17.6                   | 7.53 | 36.20                 |
| 3-4  | 4    | 3-hydroquinone dehydrogenase                   | 18.5                   | 5.26 | 47.90                 |
|      | 5    | Ferritin non-heme binding                      | 19.3                   | 5.67 | 49.10                 |
|      | 6    | DNA protection during starvation protein (dps) | 16.9                   | 5.94 | 53.47                 |
|      | 7    | flagellar protein FlaG                         | 13.4                   | 5.6  | 31.09                 |
|      | 8    | Ni-responsive regulator                        | 17.1                   | 5.36 | 27.7                  |
| 11   | 9    | molecular chaperone GroEL                      | 58.2                   | 5.59 | 51.47                 |
|      | 10   | Cytosol aminopeptidase                         | 54.4                   | 7.09 | 43.55                 |
|      | 11   | acetone carboxylase subunit beta               |                        |      | 28.19                 |
|      | 12   | hydrogenase 2 large subunit                    | 64.3                   | 7.14 | 26.12                 |
|      | 13   | IMP dehydrogenase                              | 51.8                   | 7.97 | 15.38                 |
|      | 14   | fumarate hydratase                             | 50.9                   | 7.27 | 20.30                 |
|      | 15   | cell division protein FtsA                     | 54.6                   | 6.65 | 20.28                 |
|      | 16   | ATP-dependent protease subunit HslV            | 20.0                   | 6.55 | 41.67                 |
|      | 17   | Acid stress response factor HP1286             | 20.6                   | 9.22 | 45.05                 |

|           |    |                                                           |      |      |       |
|-----------|----|-----------------------------------------------------------|------|------|-------|
| <b>12</b> | 18 | urease subunit alpha                                      | 26.6 | 8.47 | 26.05 |
|           | 19 | peroxidase                                                | 22.2 | 6.30 | 30.30 |
|           | 20 | transcription termination/antitermination<br>protein NusG | 20.2 | 7.61 | 28.98 |
|           | 21 | zinc ABC transporter substrate-binding<br>protein         | 18.1 | 8.91 | 23.72 |
| <b>19</b> | 22 | flavodoxin FldA                                           | 17.5 | 4.59 | 85.37 |
| <b>29</b> | 23 | Catalase (KatA)                                           | 58.6 | 8.66 | 44.36 |
|           | 24 | serine endoprotease DegQ                                  | 51.6 | 9.19 | 46.01 |
|           | 25 | DEAD/DEAH box family RNA helicase                         | 55.9 | 8.02 | 33.54 |
|           | 26 | malate:quinone oxidoreductase                             | 50.7 | 7.36 | 17.33 |
|           | 27 | cag pathogenicity island protein cag3                     | 55.0 | 9.92 | 37.84 |
| <b>32</b> | 28 | urease subunit alpha                                      | 26.5 | 8.47 | 69.75 |
|           | 29 | protein-disulfide isomerase                               | 29.4 | 9.04 | 57.36 |
|           | 30 | beta-lactamase HcpC                                       | 31.6 | 8.47 | 31.38 |
|           | 31 | 2-dehydro-3-deoxyphosphooctonate<br>aldolase              | 30.3 | 8.19 | 27.9  |
| <b>33</b> | 32 | peroxidase                                                | 22.2 | 6.30 | 64.14 |
|           | 33 | superoxide dismutase                                      | 24.6 | 6.21 | 56.81 |
|           | 34 | 2-keto-3-deoxy-6-phosphogluconate<br>aldolase             | 22.6 | 8.05 | 30.77 |
|           | 35 | 2-oxoglutarate-acceptor oxidoreductase<br>subunit OorC    | 20.2 | 5.72 | 29.03 |
|           | 36 | succinyl-CoA--3-ketoacid-CoA transferase                  | 22.2 | 5.59 | 30.43 |
|           | 37 | nucleotide exchange factor GrpE                           | 22.6 | 5.53 | 32.14 |

|           |    |                                                         |       |      |       |
|-----------|----|---------------------------------------------------------|-------|------|-------|
|           | 38 | Clp protease                                            | 21.5  | 5.41 | 23.47 |
|           | 39 | elongation factor P                                     | 20.8  | 5.62 | 19.79 |
|           | 40 | Cag-specific translocation protein CagZ                 | 23.0  | 5.37 | 13.57 |
| <b>35</b> | 41 | molecular chaperone DnaK                                | 67.0  | 5.14 | 50.81 |
|           | 42 | molecular chaperone GroEL                               | 58.2  | 5.76 | 33.52 |
| <b>49</b> | 43 | CagA                                                    | 132.3 | 8.82 | 53.79 |
| <b>50</b> | 44 | elongation factor Tu                                    | 43.6  | 5.26 | 83.71 |
|           | 45 | trigger factor                                          | 52.0  | 5.41 | 57.87 |
|           | 46 | ATP synthase subunit beta                               | 51.4  | 5.41 | 37.53 |
| <b>X</b>  | 47 | thioredoxin reductase                                   | 33.5  | 6.32 | 72.03 |
|           | 48 | fructose-bisphosphate aldolase                          | 33.8  | 6.30 | 43.97 |
|           | 49 | UTP--glucose-1-phosphate<br>uridylyltransferase         | 31.0  | 6.57 | 45.79 |
|           | 50 | zinc ribbon domain-containing protein                   | 29.7  | 5.87 | 35.04 |
|           | 51 | malonyl CoA-ACP transacylase                            | 34.46 | 6.79 | 37.86 |
|           | 52 | iron-dependent superoxide dismutase                     | 24.6  | 6.21 | 18.78 |
|           | 53 | protein HP1451                                          | 30.1  | 6.57 | 26.14 |
|           | 54 | hydrogenase/urease nickel incorporation<br>protein HypB | 27.3  | 5.78 | 25.62 |
|           | 55 | fumarate reductase                                      | 27.6  | 5.54 | 22.45 |
